# Supplementary material
Source: PubMed Central journal article supplement (PMC7869479)
Supplement: 13054_2020_3433_MOESM1_ESM.pdf [file 13054_2020_3433_MOESM1_ESM.pdf]

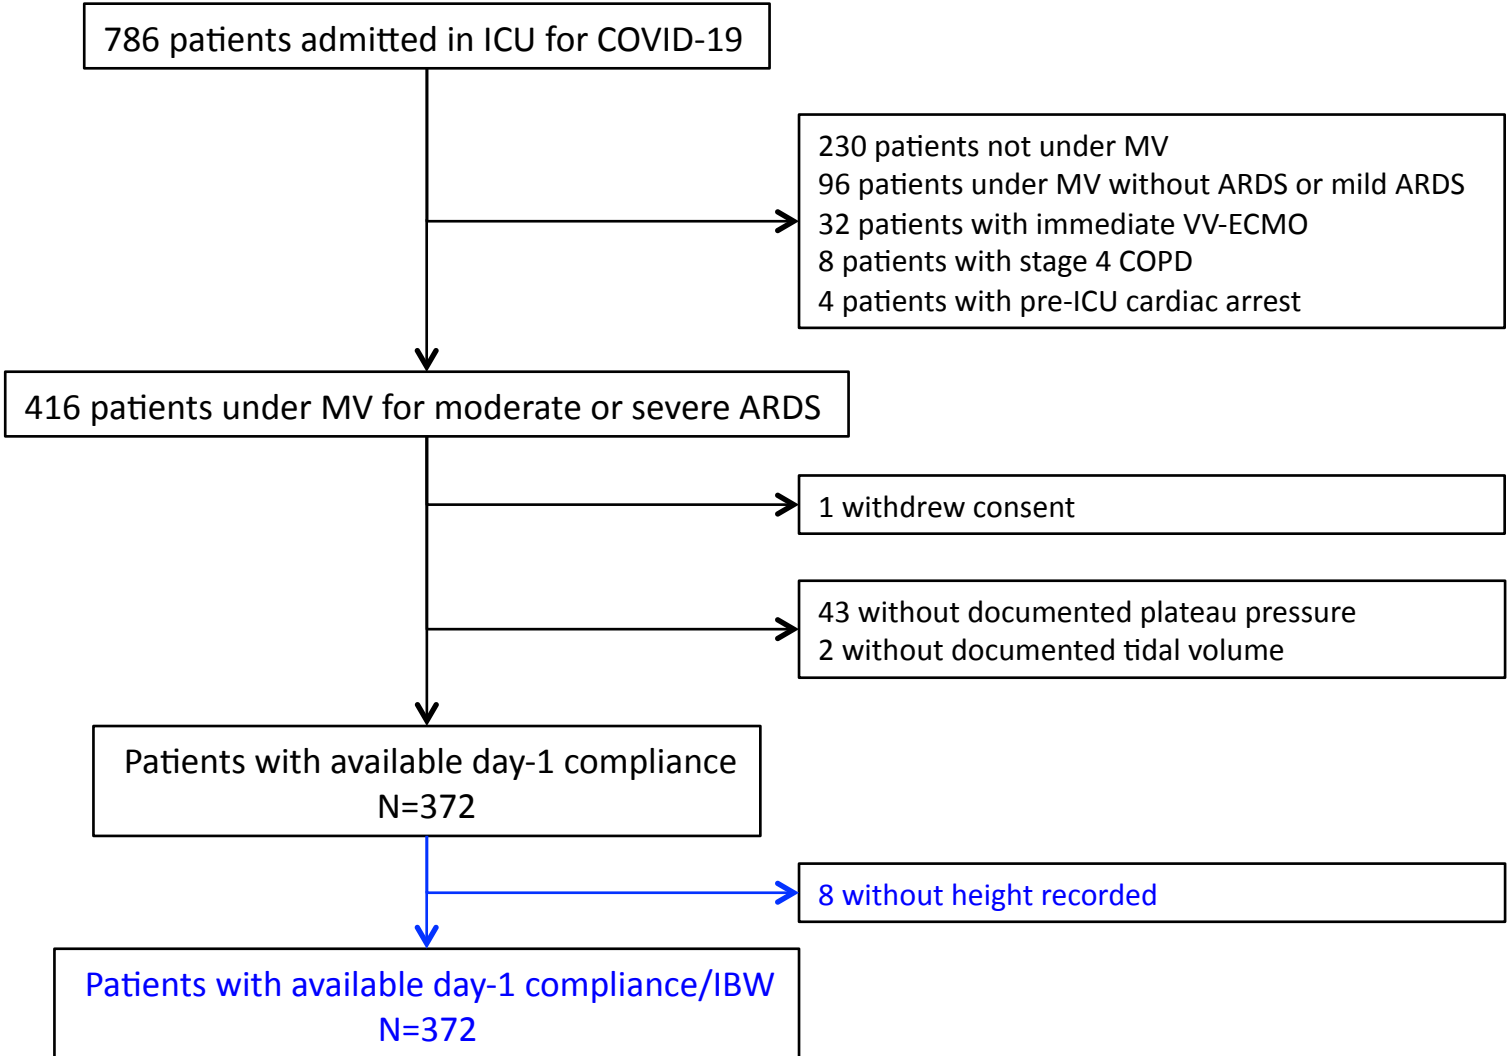

MV: Mechanical ventilation; ARDS: Acute respiratory distress syndrome; IBW: ideal body weight
